# Supplementary material for: A stress assembly that confers cell viability by preserving ERES components during amino-acid starvation
Source: eLife journal article supplement (doi:10.7554/elife.04132), 2014-11-11
Supplement: supp [file elife-04132-supp-v1.zip]

**Figure 6-figure source data 1: Low complexity sequences in proteins related to stress granules and P-bodies, and to the secretory pathway.**

| <b>A Stress granules and P-bodies</b> |                   |               |                 |             |                |
|---------------------------------------|-------------------|---------------|-----------------|-------------|----------------|
| <b>Protein</b>                        | <b>Flybase ID</b> | <b>LCs AA</b> | <b>Total AA</b> | <b>% LC</b> | <b>p-value</b> |
| Atx2.1                                | FBgn0041188       | 489           | 1084            | 45.11%      | <10-5          |
| Caprin                                | FBgn0042134       | 450           | 961             | 46.83%      | <10-5          |
| FMR1                                  | FBgn0028734       | 182           | 729             | 24.97%      | <10-5          |
| Gawki                                 | FBgn0051992       | 416           | 1384            | 30.06%      | <10-5          |
| Squid                                 | FBgn0263396       | 114           | 344             | 33.14%      | <10-5          |
| TDP43                                 | FBgn0025790       | 119           | 531             | 22.41%      | NS             |
| Tral                                  | FBgn0041775       | 317           | 657             | 48.25%      | <10-5          |
| Ago                                   | FBgn0041171       | 221           | 1326            | 16.67%      | NS             |
| Dcp1                                  | FBgn0034921       | 17            | 372             | 4.57%       | <10-5          |
| Rox8                                  | FBgn0005649       | 141           | 470             | 30.00%      | NS             |
| <b>B Secretory pathway</b>            |                   |               |                 |             |                |
| <b>Protein</b>                        | <b>Flybase ID</b> | <b>LCs AA</b> | <b>Total AA</b> | <b>% LC</b> | <b>p-value</b> |
| Sec16                                 | FBgn0052654       | 580           | 2021            | 28.70%      | <10-5          |
| Sar1                                  | FBgn0038947       | 0             | 193             | 0.00%       | NS             |
| Sec24AB                               | FBgn0033460       | 294           | 1184            | 24.83%      | <10-5          |
| Sec24CD                               | FBgn0262126       | 308           | 1231            | 25.02%      | <10-5          |
| Sec23                                 | FBgn0262125       | 28            | 781             | 3.59%       | NS             |
| Sec13                                 | FBgn0024509       | 49            | 356             | 13.76%      | NS             |
| Sec31                                 | FBgn0033339       | 143           | 1241            | 11.52%      | NS             |
| dGMAP                                 | FBgn0027287       | 355           | 1398            | 25.39%      | <10-5          |
| dGRASP                                | FBgn0036919       | 101           | 460             | 21.96%      | <10-5          |
| p125                                  | FBgn0031990       | 247           | 2016            | 12.25%      | NS             |
| Garz                                  | FBgn0264560       | 197           | 1983            | 9.93%       | NS             |
| Beta COP                              | FBgn0008635       | 45            | 964             | 4.67%       | NS             |
| Alpha COP                             | FBgn0025725       | 90            | 1234            | 7.29%       | NS             |
| Gamma COP                             | FBgn0028968       | 15            | 897             | 1.67%       | NS             |
| Epsilon COP                           | FBgn0027496       | 0             | 306             | 0.00%       | NS             |
| Delta COP                             | FBgn0028969       | 88            | 532             | 16.54%      | <10-2          |
| Erk7                                  | FBgn0052703       | 106           | 916             | 11.57%      | NS             |
| KDEL receptor                         | FBgn0022268       | 0             | 212             | 0.00%       | NS             |
| GM130                                 | FBgn0034697       | 193           | 795             | 24.28%      | <10-5          |
| Lava lamp                             | FBgn0029688       | 595           | 2779            | 21.41%      | <10-5          |

NS: non significant. The proteins with an LCS content above 21% are marked in yellow
